# Supplementary material
Source: Springer Nature journal article supplement (https://www.springermedizin.de/resource/supplementary/13054_2011_9633_MOESM3_ESM.pdf/9706660)
Supplement: MOESM3 [file 9706660]

# Do you or your department/group manage these patients in the intensive care unit?

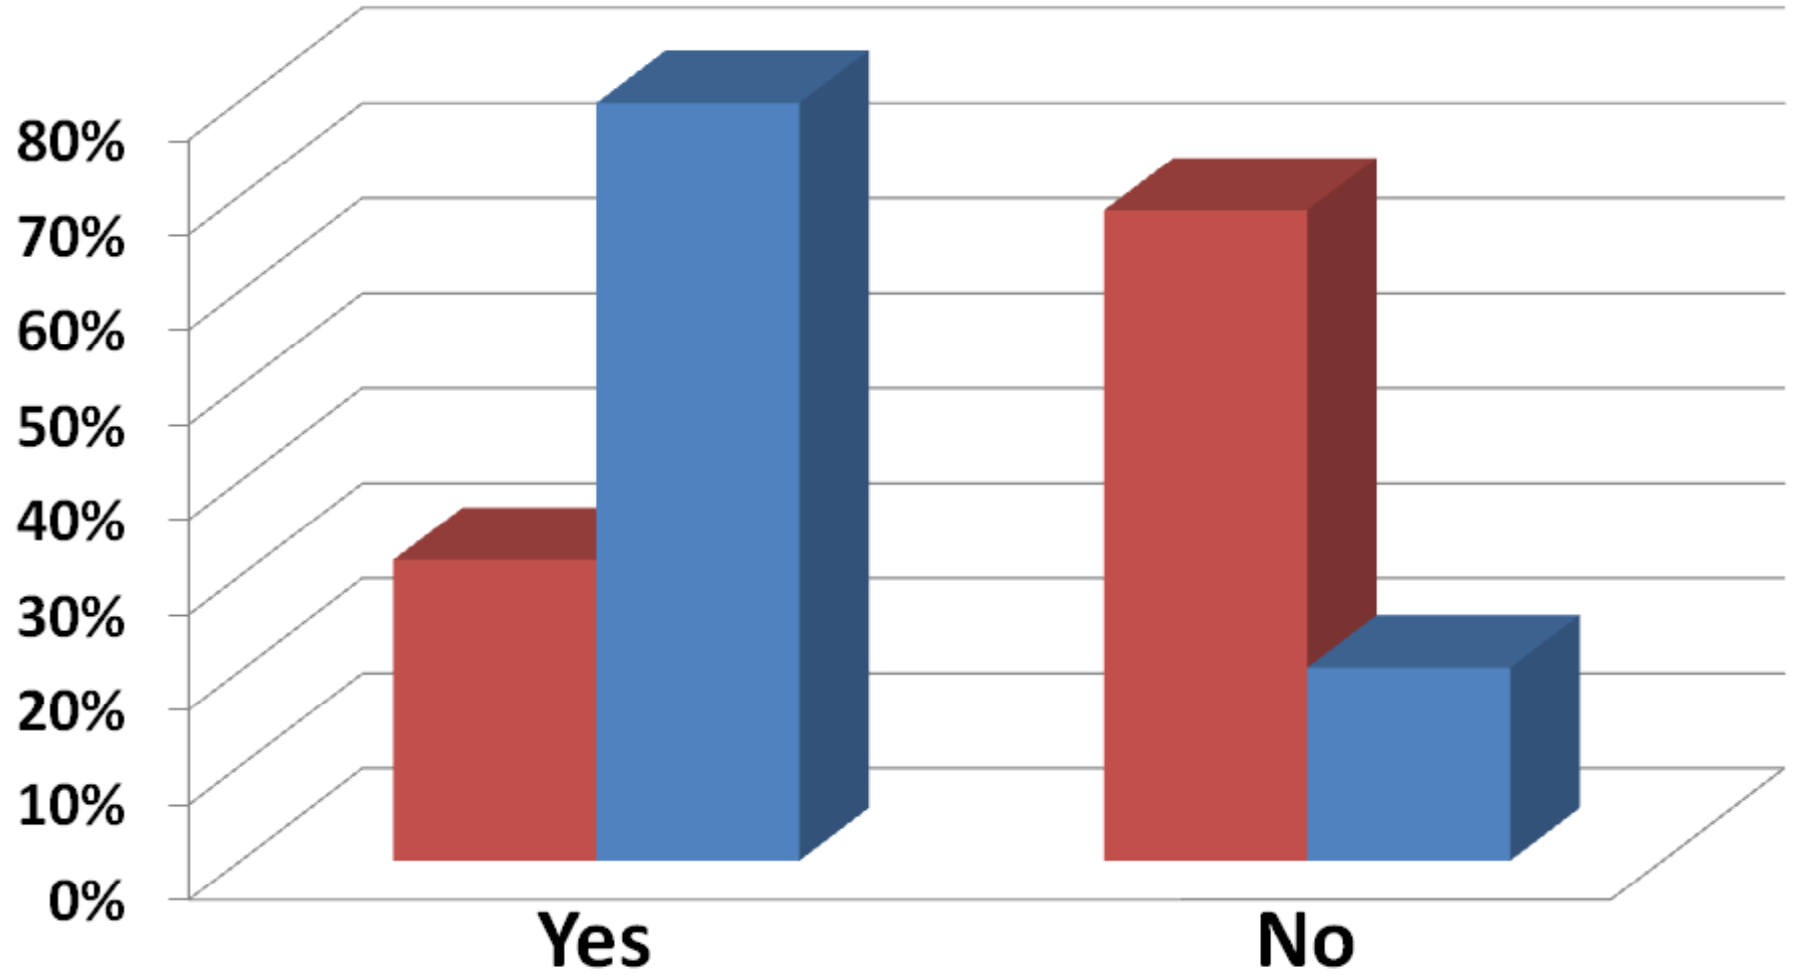

 **ASA respondents**

 **ESA respondents**
